# Supplementary material
Source: PubMed Central journal article supplement (PMC5741521)
Supplement: NIHMS926979-supplement-Supplemental_Slides.pdf [file NIHMS926979-supplement-Supplemental_Slides.pdf]

# An Unmet Clinical Need: The History of Thrombus Imaging

**Gregory M Lanza, Grace Cui, Anne H Schmieder, Huiying Zhang,  
John S Allen, Michael J. Scott, Todd Williams, Xiaoxia Yang**  
**Department of Medicine, Division of Cardiology,  
Washington University Medical School, St. Louis, MO 63108**

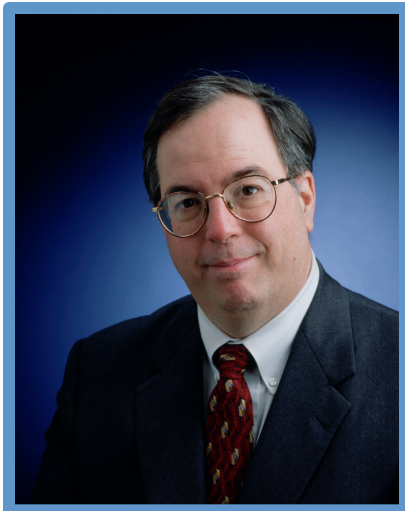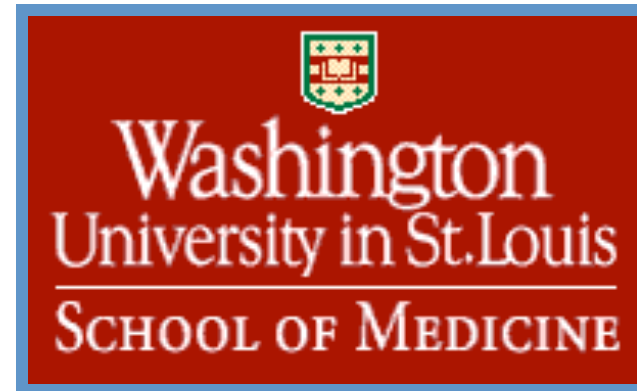

# Overview

- 1- Robust thrombus imaging is an unresolved clinical unmet need dating back to the mid 1970's.**
- 2- Molecular imaging approaches began with nuclear SPECT imaging, contrast agents for virtually all biomedical imaging modalities have been demonstrated**
- 3-Two primary molecular imaging targets have been pursued for thrombus imaging: platelets and fibrin.**
- 4- Acute thrombus is readily imaged with all probes and modalities, but aged thrombus remains a challenge**
- 5- Anticoagulation continues to interfere and often negates thrombus imaging efficacy**

# Figure 1

Pre-contrast

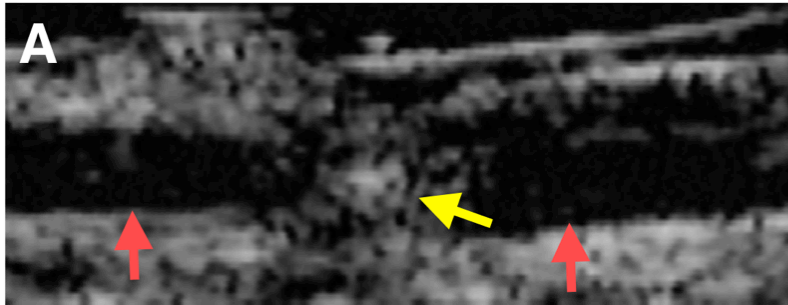

Post-contrast

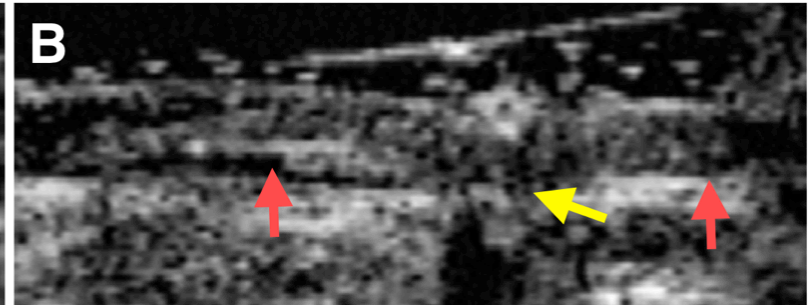

**Acoustic enhancement of canine femoral artery thrombus before (A) and after (B) exposure to targeted perfluorocarbon emulsion. (7.5-MHz linear-array, focused transducer).**

**The transmurular electrode (yellow arrow) Post contrast thrombus is easily recognized (red arrows)**

**Reproduced with permission reference (79).**

# Figure 2

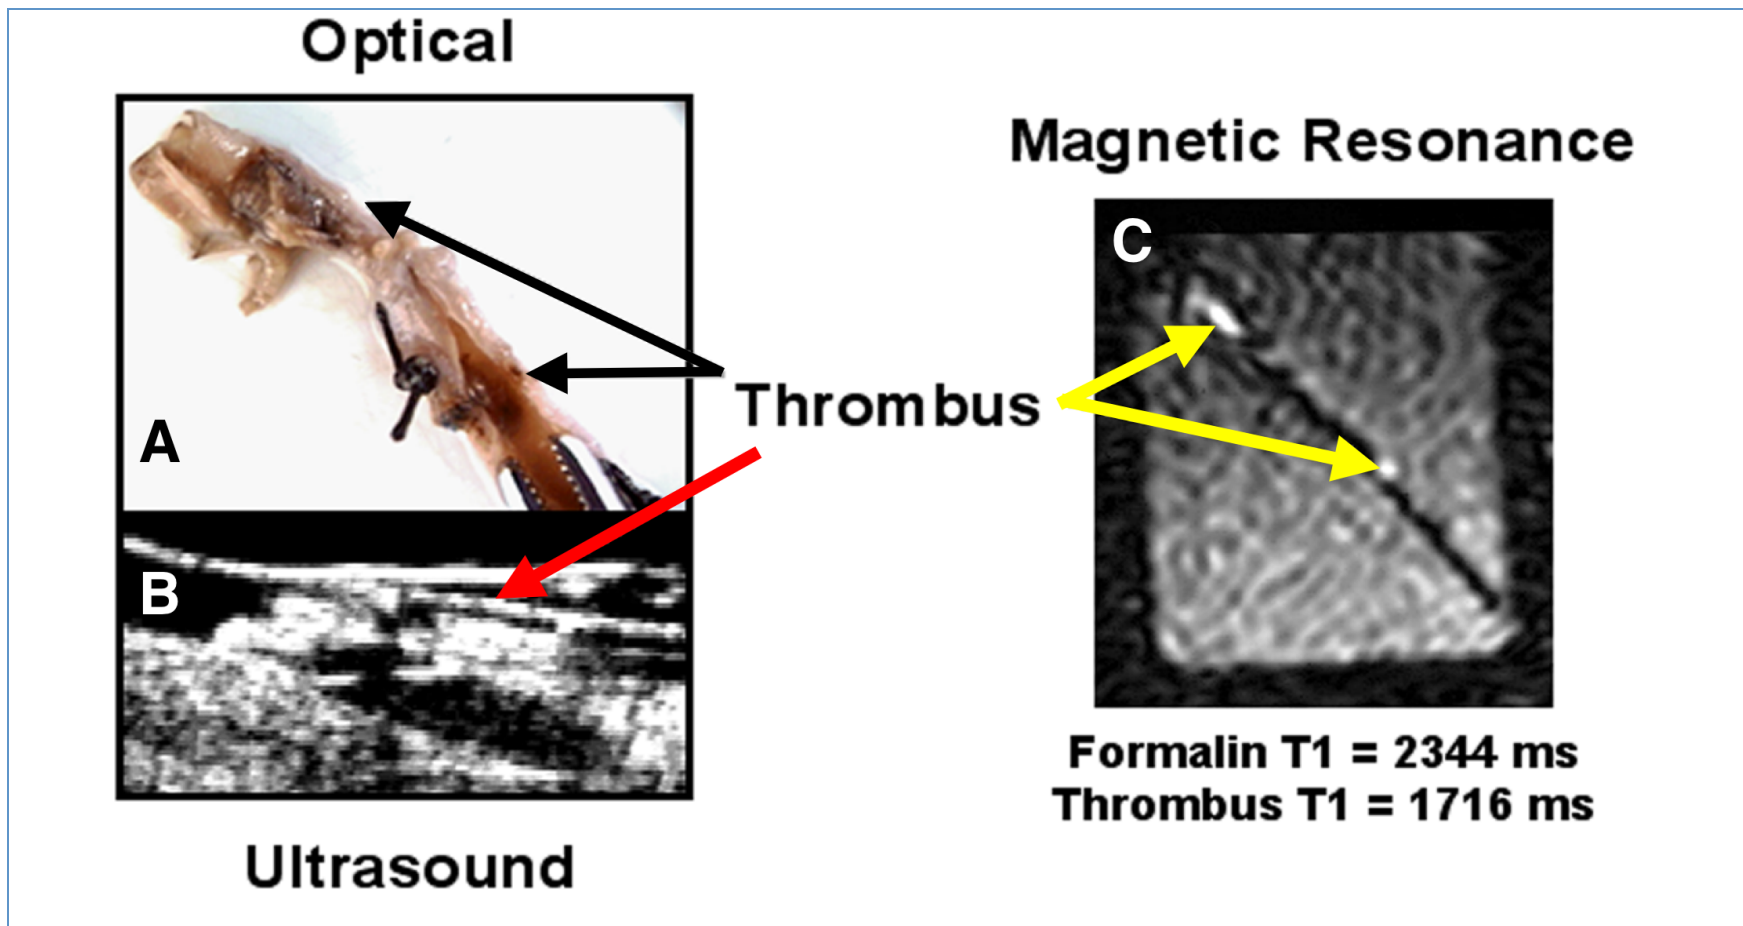

# Figure 3

**A. CT blood pool signal in rabbits following IV injection of NanoK.**

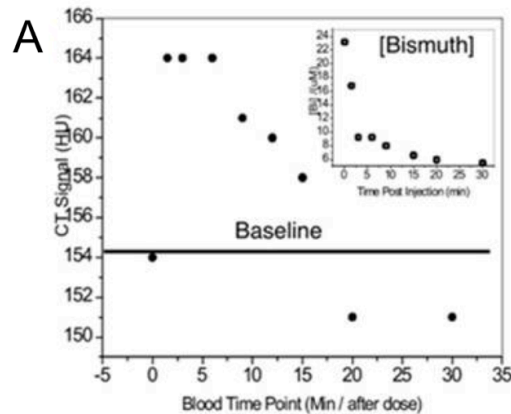

**(B-C) targeting in situ clot (thrombus) in rabbits;**

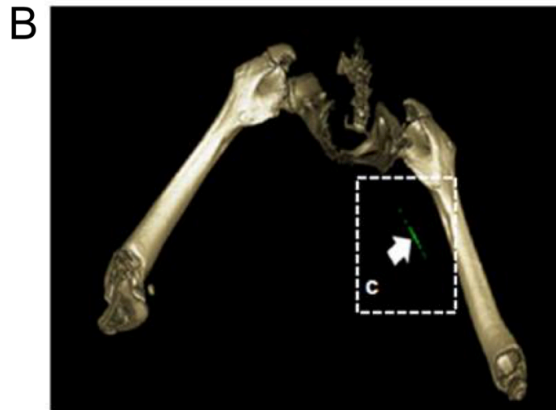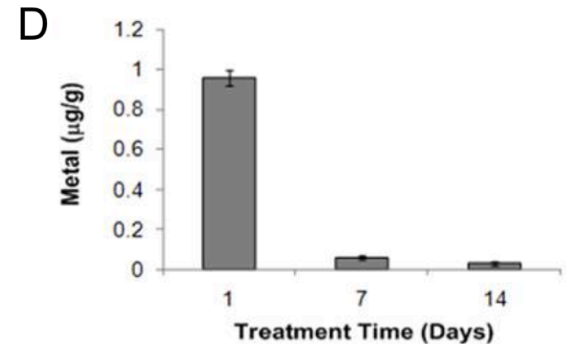

**(D) two weeks clearance profile of bismuth from mice.**

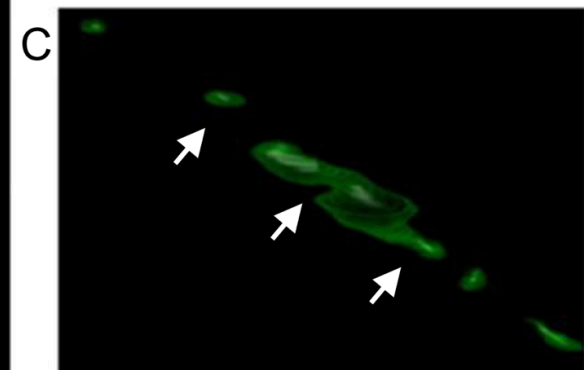

Reproduced with permission (119).
